# Supplementary material
Source: PubMed Central journal article supplement (PMC6306677)
Supplement: Supp_Fig1.pdf [file Supp_Fig1.pdf]

## Supplementary Data

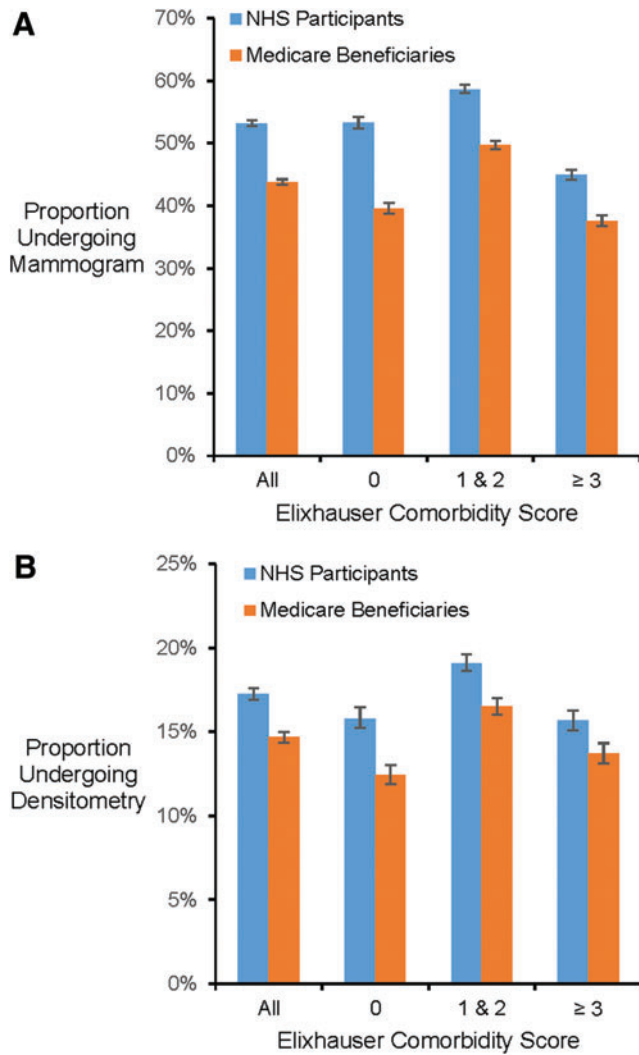

**SUPPLEMENTARY FIG. S1.** (A) 2012 Mammography utilization by NHS participants and matched Medicare beneficiaries. (B) 2012 DEXA bone densitometry by NHS participants and matched Medicare beneficiaries. NHS, Nurses' Health Study; DEXA, dual-energy x-ray absorptiometry.
