# Supplementary material
Source: PubMed Central journal article supplement (PMC6306677)
Supplement: Supp_Fig2.pdf [file Supp_Fig2.pdf]

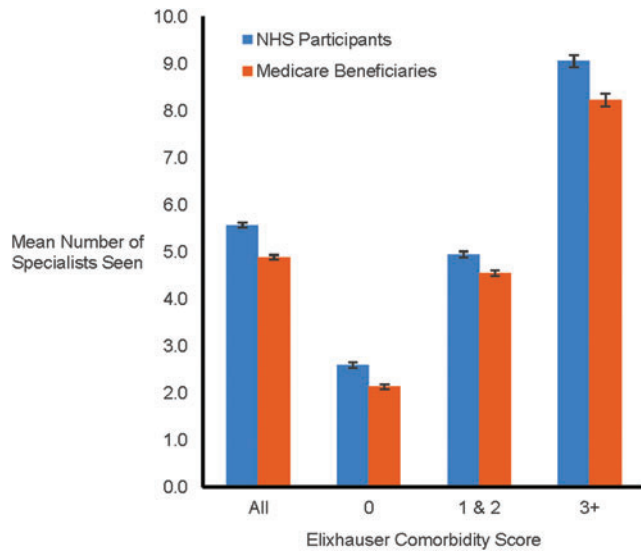

**SUPPLEMENTARY FIG. S2.** Specialty physician visits by NHS participants and matched Medicare beneficiaries in 2012, stratified by comorbidity status. These data show the mean number of visits to specialists by NHS participant and matched Medicare beneficiary women in 2012, in aggregate (“All”) and as stratified by Elixhauser comorbidity score.
