# Supplementary material
Source: PubMed Central journal article supplement (PMC6306677)
Supplement: Supp_Table1.pdf [file Supp_Table1.pdf]

SUPPLEMENTARY TABLE S1. COMPARISON OF DEMOGRAPHICS AND BASELINE HEALTH CARE UTILIZATION  
OF NURSES' HEALTH STUDY PARTICIPANTS ELIGIBLE FOR MEDICARE LINKAGE AGAINST  
THOSE WHO WERE INELIGIBLE

|                                                   | <i>NHS participants eligible<sup>a</sup><br/>for Medicare linkage,<br/>N = 47,391</i> | <i>NHS participants ineligible<sup>a</sup><br/>for Medicare linkage,<br/>N = 25,452</i> | p - Value |
|---------------------------------------------------|---------------------------------------------------------------------------------------|-----------------------------------------------------------------------------------------|-----------|
| Age [mean (SD)]                                   | 76.6 (7)                                                                              | 75.3 (7)                                                                                | <0.01     |
| Died between January<br>and December 2012 [N (%)] | 1,590 (3)                                                                             | 753 (3.0)                                                                               | <0.01     |
| Race [N (%)]                                      |                                                                                       |                                                                                         | <0.01     |
| White                                             | 46,221 (98)                                                                           | 24,436 (96)                                                                             |           |
| Black                                             | 704 (2)                                                                               | 593 (2)                                                                                 |           |
| Other (includes Hispanic)                         | 466 (1)                                                                               | 423 (2)                                                                                 |           |
| Employment status [N (%)]                         |                                                                                       |                                                                                         | <0.01     |
| Full-time                                         | 555 (1)                                                                               | 990 (4)                                                                                 |           |
| Part-time                                         | 3,087 (7)                                                                             | 1,969 (8)                                                                               |           |
| Not employed                                      | 26,720 (56)                                                                           | 13,509 (53)                                                                             |           |
| Census region [N (%)]                             |                                                                                       |                                                                                         | <0.01     |
| Northeast                                         | 22,545 (48)                                                                           | 11,841 (47)                                                                             |           |
| South                                             | 11,895 (25)                                                                           | 3,896 (15)                                                                              |           |
| Midwest                                           | 7,053 (15)                                                                            | 5,323 (21)                                                                              |           |
| West                                              | 5,898 (13)                                                                            | 4,380 (17)                                                                              |           |
| Health indicators [N (%)]                         |                                                                                       |                                                                                         |           |
| Current smoker                                    | 2,193 (5)                                                                             | 1,296 (5)                                                                               | <0.01     |
| Physical exam                                     | 29,836 (63)                                                                           | 16,187 (64)                                                                             | 0.96      |
| Mammogram                                         | 25,081 (53)                                                                           | 13,793 (54)                                                                             | <0.01     |
| Eye exam                                          | 29,002 (61)                                                                           | 15,697 (62)                                                                             | 0.52      |
| Colonoscopy                                       | 10,643 (23)                                                                           | 5,624 (22)                                                                              | 0.13      |
| Screened for depression                           | 1.77 (2)                                                                              | 1.66 (2.2)                                                                              | <0.01     |
| Body mass index [mean (std)]                      | 26.06 (5)                                                                             | 26.41 (5.5)                                                                             | <0.01     |

<sup>a</sup>Women eligible for the Medicare linkage were required to have continuous enrollment in fee for service (Part A and B only) Medicare for 12 months January 2012 through December 2012. Reasons for ineligibility included discontinuous enrollment, partial year enrollment, or any Part C coverage.  
NHS, Nurses' Health Study.
