# Supplementary material
Source: PubMed Central journal article supplement (PMC6306677)
Supplement: Supp_Table2.pdf [file Supp_Table2.pdf]

Supplementary Table S2. 2012 Spending by Nurses' Health Study Participants and Matched Medicare Beneficiaries Stratified by Count of Comorbid Conditions

| Spending category                   | Patient Elixhauser comorbidity count |                                |       |                  |                                |       |                  |                                |                                  |                  |                                |       |                             |                                |
|-------------------------------------|--------------------------------------|--------------------------------|-------|------------------|--------------------------------|-------|------------------|--------------------------------|----------------------------------|------------------|--------------------------------|-------|-----------------------------|--------------------------------|
|                                     | All patients (N = 94,388)            |                                |       |                  | Elixhauser = 0 (N = 24,599)    |       |                  |                                | Elixhauser = 1 or 2 (N = 43,188) |                  |                                |       | Elixhauser ≥ 3 (N = 26,601) |                                |
|                                     | NHS participants                     | Matched Medicare beneficiaries | p     | NHS participants | Matched Medicare beneficiaries | p     | NHS participants | Matched Medicare beneficiaries | p                                | NHS participants | Matched Medicare beneficiaries | p     | NHS participants            | Matched Medicare beneficiaries |
| N                                   | 47,194                               | 47,194                         |       | 11,962           | 12,637                         |       | 21,211           | 21,977                         |                                  | 14,021           | 12,580                         |       |                             |                                |
| Mean standardized Medicare spending |                                      |                                |       |                  |                                |       |                  |                                |                                  |                  |                                |       |                             |                                |
| Total                               | \$10,138                             | \$8,904                        | <0.01 | \$2,915          | \$2,259                        | <0.01 | \$5,905          | \$5,687                        | 0.01                             | \$22,704         | \$21,200                       | <0.01 |                             |                                |
| Inpatient hospital                  | \$3,889                              | \$3,344                        | <0.01 | \$302            | \$118                          | <0.01 | \$1,102          | \$1,167                        | 0.17                             | \$11,164         | \$10,387                       | <0.01 |                             |                                |
| Outpatient hospital                 | \$1,344                              | \$1,142                        | <0.01 | \$467            | \$353                          | <0.01 | \$1,050          | \$938                          | <0.01                            | \$2,539          | \$2,293                        | <0.01 |                             |                                |
| Part B professional services        | \$3,901                              | \$3,469                        | <0.01 | \$1,680          | \$1,404                        | <0.01 | \$3,200          | \$3,017                        | <0.01                            | \$6,857          | \$6,332                        | <0.01 |                             |                                |
| Durable medical equipment           | \$204                                | \$210                          | 0.31  | \$47             | \$46                           | 0.88  | \$123            | \$125                          | 0.86                             | \$462            | \$460                          | 0.95  |                             |                                |
| Hospice                             | \$333                                | \$287                          | 0.03  | \$349            | \$269                          | 0.08  | \$210            | \$181                          | 0.29                             | \$505            | \$489                          | 0.74  |                             |                                |
| Home health                         | \$467                                | \$470                          | 0.80  | \$71             | \$70                           | 0.97  | \$220            | \$259                          | <0.01                            | \$1,177          | \$1,239                        | 0.08  |                             |                                |
| Part B professional services        |                                      |                                |       |                  |                                |       |                  |                                |                                  |                  |                                |       |                             |                                |
| E/M visits                          | \$1,416                              | \$1,299                        | <0.01 | \$558            | \$469                          | <0.01 | \$1,070          | \$1,059                        | 0.13                             | \$2,673          | \$2,551                        | <0.01 |                             |                                |
| Procedures                          | \$1,120                              | \$988                          | <0.01 | \$559            | \$466                          | <0.01 | \$1,016          | \$931                          | <0.01                            | \$1,756          | \$1,614                        | <0.01 |                             |                                |
| Laboratory tests                    | \$380                                | \$349                          | <0.01 | \$181            | \$153                          | <0.01 | \$348            | \$333                          | <0.01                            | \$599            | \$574                          | <0.01 |                             |                                |
| Imaging studies                     | \$358                                | \$328                          | <0.01 | \$174            | \$145                          | <0.01 | \$317            | \$305                          | <0.01                            | \$576            | \$552                          | <0.01 |                             |                                |
| Durable medical equipment           | \$627                                | \$504                          | <0.01 | \$207            | \$171                          | 0.04  | \$449            | \$338                          | 0.02                             | \$1,253          | \$1,040                        | <0.01 |                             |                                |
